# Supplementary material for: Mild COVID-19 Was Not Associated with Impaired IVF Outcomes or Early Pregnancy Loss in IVF Patients
Source: J Clin Med. 2022 Sep 6;11(18):5265. doi: 10.3390/jcm11185265 (PMC9505769; doi:10.3390/jcm11185265)
Supplement: Supplementary file 1 [file jcm-11-05265-s001.zip › jcm-1849504-supplementary.pdf]

**Supplementary Table S1. Logistic regression summary model**—Pregnancy loss according to COVID-19 exposure, age, BMI, diagnosis, smoking status, uterine malformations and recurrent pregnancy loss history .

| <b>Not in Equation</b>       | <b><i>p</i>-Value</b> |
|------------------------------|-----------------------|
| Age                          | 0.05                  |
| BMI                          | 0.43                  |
| Diagnosis(male vs. non male) | 0..65                 |
| Smoking                      | 0.09                  |
| Uterine malformation         | 0.11                  |
| COVID-19 exposure            | 0.56                  |
| <b>In equation</b>           |                       |
| RPL                          | 0.01                  |
